# Supplementary material for: p53 promotes revival stem cells in the regenerating intestine after severe radiation injury
Source: PubMed Central journal article supplement (PMC11001929; doi:10.1038/s41467-024-47124-8), 2024-04-08
Supplement: 41467_2024_47124_MOESM3_ESM.pdf [file 41467_2024_47124_MOESM3_ESM.pdf]

## **Description of Additional Supplementary Files**

**File Name: Supplementary Data 1**

**Description:** Differentially expressed genes in each cell cluster.

**File Name: Supplementary Data 2**

**Description:** Publicly available gene signatures used in this study.
